# Supplementary material
Source: Springer Nature journal article supplement (https://www.springermedizin.de/resource/supplementary/12879_2012_2093_MOESM5_ESM.pdf/9443558)

## Incidence Density Rate ( IDR) of VAP/1000 MV-day 2004 - 2010

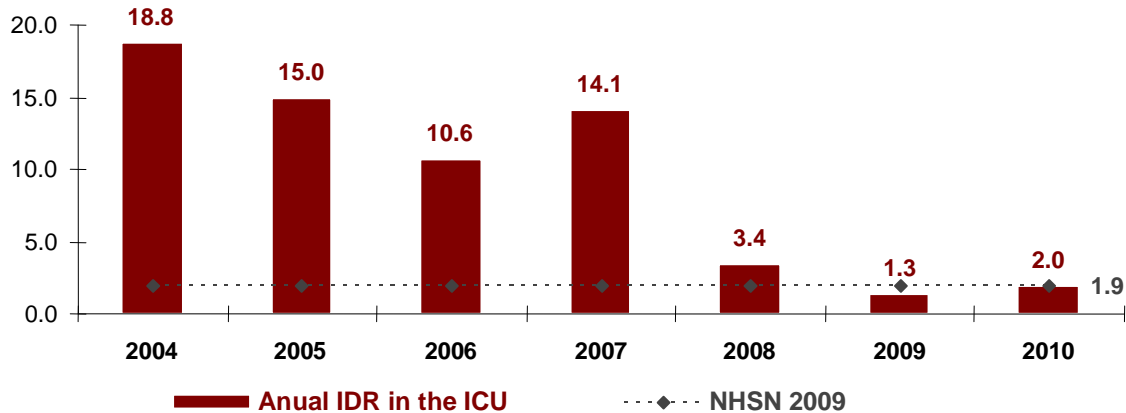

Supplement: MOESM5 [file 9443558]
